# Supplementary material for: Profiling Dopamine-Induced Oxidized Proteoforms of β-synuclein by Top-Down Mass Spectrometry
Source: MDPI journal article supplement (doi:10.3390/antiox10060893), 2021-06-01
Supplement: s1 [file s1]

# Profiling dopamine-induced oxidized proteoforms of $\beta$ -synuclein by top-down mass spectrometry

Arianna Luise<sup>1</sup>, Elena De Cecco<sup>2</sup>, Erika Ponzini<sup>3</sup>, Martina Sollazzo<sup>2</sup>, PierLuigi Mauri<sup>4</sup>, Frank Sobott<sup>5</sup>, Giuseppe Legname<sup>2</sup>, Rita Grandori<sup>1</sup>, and Carlo Santambrogio<sup>1\*</sup>

<sup>1</sup> Department of Biotechnology and Biosciences, University of Milano-Bicocca, Piazza della Scienza 2, 20126 Milan, Italy; a.luise1@campus.unimib.it (A.L.), rita.grandori@unimib.it (R.G.), carlo.santambrogio@unimib.it (C.S.)

<sup>2</sup> Department of Neuroscience, Scuola Internazionale Superiore di Studi Avanzati (SISSA) and ELETTRA-Sincrotrone Trieste S.C.p.A, 34136 Trieste, Italy; edececco@sissa.it (E.D.C.), legname@sissa.it (G.L.)

<sup>3</sup> Department of Materials Science, University of Milano-Bicocca, Via Roberto Cozzi 55, I-20125 Milan, Italy; erika.ponzini@unimib.it (E.P.)

<sup>4</sup> Institute of Biomedical Technologies, National Research Council of Italy, Segrate, 20090 Milan, Italy; pierluigi.mauri@itb.cnr.it (P.M.)

<sup>5</sup> Astbury Centre for Structural Molecular Biology, University of Leeds, Leeds LS2 9JT, United Kingdom; F.Sobott@leeds.ac.uk (F.S.)

\* Correspondence: carlo.santambrogio@unimib.it; Tel.: +39 02 6448 3395

## SUPPLEMENTARY MATERIALS

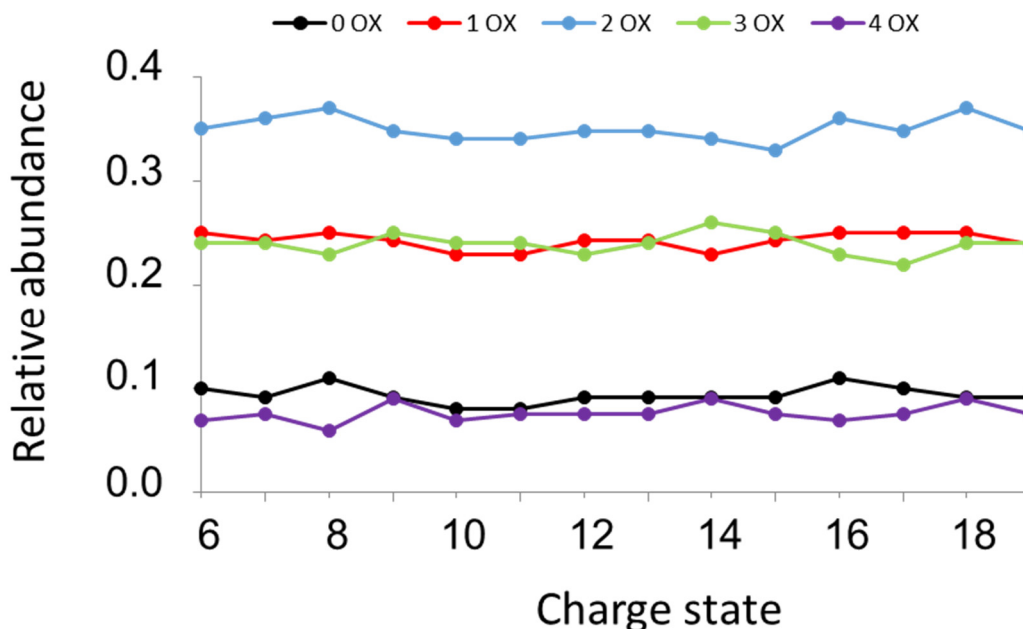

**Figure S1.** Dependence of OE values on charge state in MS spectra. Relative abundance of OE values vs charge state in MS spectra under denaturing conditions, after 24 h incubation of BS in the presence of DA.
